# Supplementary material
Source: publisher figshare collection journal article supplement (https://future-science-group.figshare.com/articles/dataset/_/22309489)
Supplement: Supplementary file 1 [file 1]

**Supplementary Material-2**

**Inhibition of α-Glucosidase Enzyme by “Click” Inspired Pharmacophore Framework 1,3,4-Thiadiazole-1,2,3-Triazole Hybrids**

**Content page**

1. IC50 curves of all the compounds S2.2-S2.3
2. Lineweaver-Burk plots of **9n**, **9e**, **9m** and **9h** S2.4-S2.5
3. Secondary plots of **9n**, **9e**, **9m** and **9h** S2.6-S2.9

**Curves**

IC50 Curves (Graphs showing the data that were used to calculate the IC50 values)

Lineweaver-Burk Plots

Compound **9n**

Compound **9e**

Compound **9m**

Compound **9h**

Secondary Plots1 (to calculate *Ki* (ESI-complex), *Ki’*(EI-complex), *Km* and Vmax values)

Compound **9n** (*Ki* = 29.36 μM & *Ki’* = 464.87 μM)

Secondary plot of intercept versus inhibitor concentration

Secondary plot of slope versus inhibitor concentration

Compound **9e** (*Ki* = 30.50 μM)

Secondary plot of intercept versus inhibitor concentration

Secondary plot of 1/Km’ versus inhibitor concentration

Compound **9m** (*Ki* = 42.80 μM & *Ki’* = 221.80 μM)

Secondary plot of intercept versus inhibitor concentration

Secondary plot of slope versus inhibitor concentration

Compound **9h** (*Ki* = 43.50 μM & *Ki’* = 366.50 μM)

Secondary plot of intercept versus inhibitor concentration

Secondary plot of slope versus inhibitor concentration

**References**

1. T. Palmer, P. Balmer, Enzymes: Biochemistry, Biotechnology and Clinical Chemistry, Second ed., Woodhead Publishing, United Kingdom, 2007.
